# Supplementary material
Source: publisher figshare collection journal article supplement (https://frontiersin.figshare.com/ndownloader/files/25321538)
Supplement: Supplementary file 1 [file 25321538]

ASPICP-V4 ## This EXACT STRING indicates v4 file format

"Projection of I. Fuscus Galapagos" ## Projection title (use ** to get * in AGRAPH)

CPUEPepinoBOT.bio ## BIO file to read

0.25 ## CV of MSY for projections (0.0 <= CV <= 1.0)

PC 1 ## Interval type (BC|PC), smoothing (1|0)

0 ## Years to drop at start of plots

1 1 1 ## Options (1|0): run agraph, write prb file, write rdat file

4856257 ## Random number seed

# Projection specs follow here:

x10 0.0 FMSY

%% END

=============================================================================

NOTES ON PROJECTION SPECIFICATIONS

A specification line may begin with--

xN : Repeat the spec for N years

# : Ignore this line. It is a comment.

% : End of specs. REQUIRED to mark end.

None of the above, and just contain the spec itself.

-------------------------------------------------------------------------------------------------------

Each spec has two values:

(1) A real number, the projected yield or effort.

(2) A character string that indicates what the number means. Options:

YABS = yield in same units as assessment

YREL = yield, relative to yield in last year of assessment

MSY = yield, relative to MSY as estimated by the assessment

FREL = fishing mortality rate, relative to the last year of the assessment (v.3 option 'F')

FMSY = fishing mortality rate, relative to Fmsy as estimated by the assessment

NOTE: Using option YREL requires a BIO file from ASPIC 5.38 or later.

=============================================================================
